# Supplementary material
Source: PubMed Central journal article supplement (PMC6080600)
Supplement: NIHMS979333-supplement-2.pdf [file NIHMS979333-supplement-2.pdf]

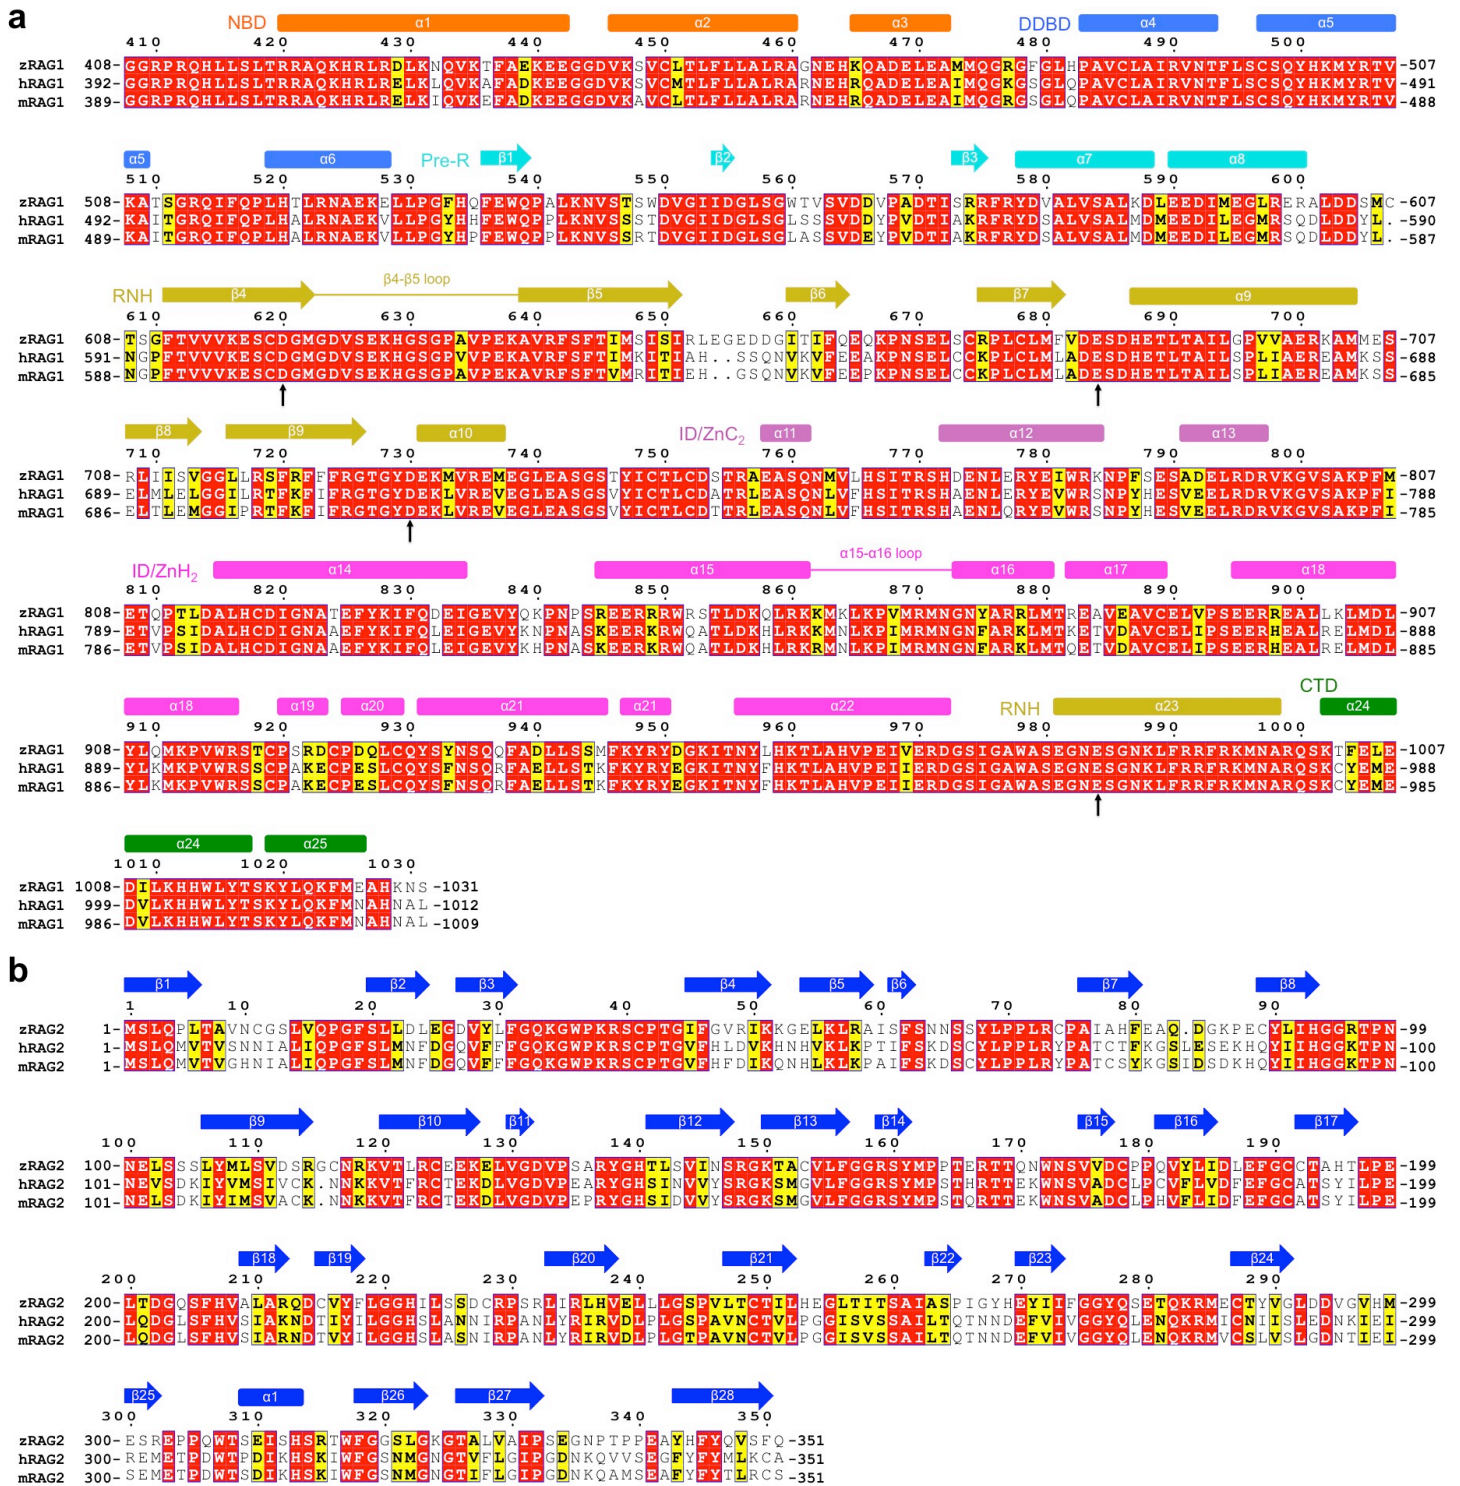

## Supplementary Note 1

Structure based sequence alignment of zebrafish, human and mouse RAG1 and RAG2 core region

Sequence alignment in the core regions of zebrafish, human and mouse RAG1 (a) and RAG2 (b). Secondary structures of zRAG1 and zRAG2 were assigned based on the 3.4 Å model of the nicked DNA complex. The secondary structures are colored as in Fig. 1a based on the domain organization. Four catalytic residues are

indicated by black arrows.  $\beta$ 4- $\beta$ 5 and  $\alpha$ 15- $\alpha$ 16 loop regions are indicated by lines. The sequence alignment was generated in Esript<sup>1</sup>.

1. Robert, X. & Gouet, P. Deciphering key features in protein structures with the new ENDscript server. *Nucleic Acids Res* **42**, W320-4 (2014).
